# Supplementary material
Source: PubMed Central journal article supplement (PMC9769642)
Supplement: spectrum.01781-22-s0001.pdf [file spectrum.01781-22-s0001.pdf]

## Supplementary information

**Figure S1A and B.** Maximum-likelihood phylogenetic tree of swine and human influenza A viruses isolated in North America between 2002-2019 and downsampled to retain 98% sequence identity. Tips are coloured by country of origin of swine strains (S1A) and host species the strain was isolated from (S1B).

Figure S1A

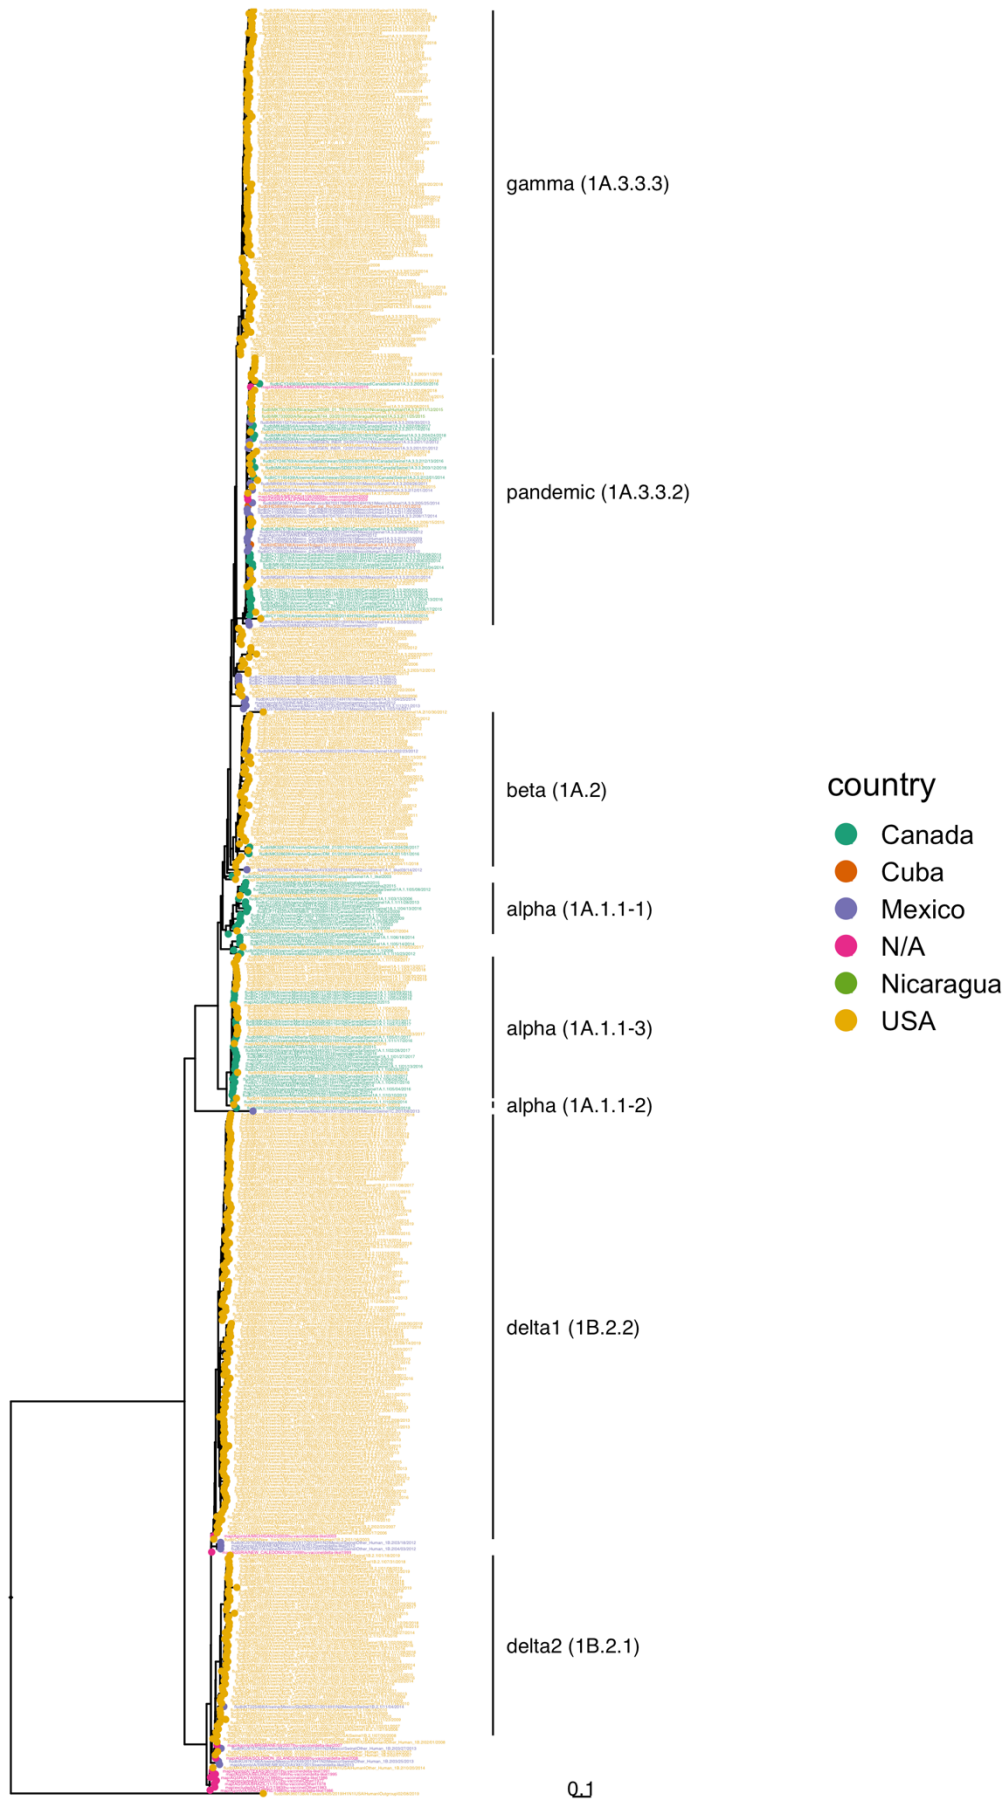

Figure S1B

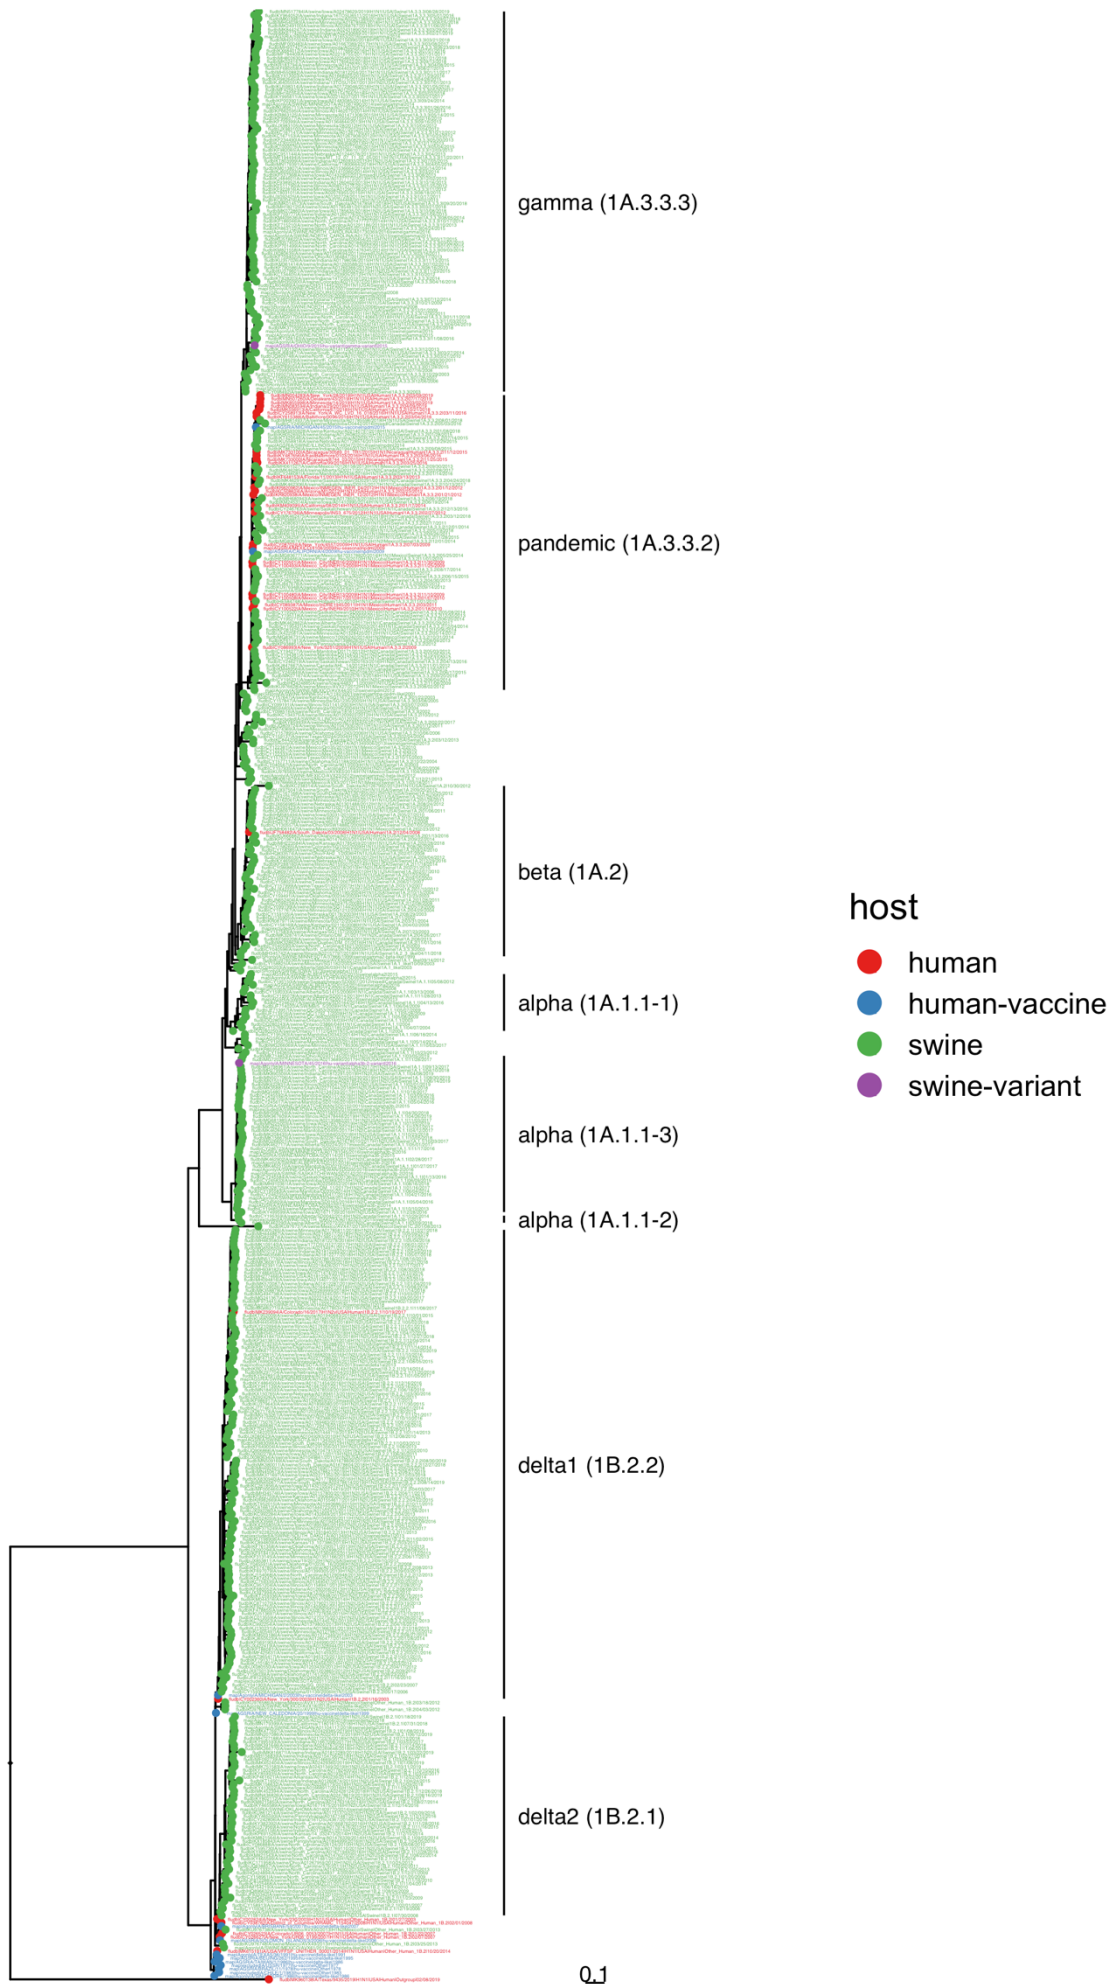

**Figure S2.** A scatterplot of genetic (amino acid) versus antigenic distance between viruses within the 1A and 1B lineages with a linear model regression line fitted to the data.

Figure S2

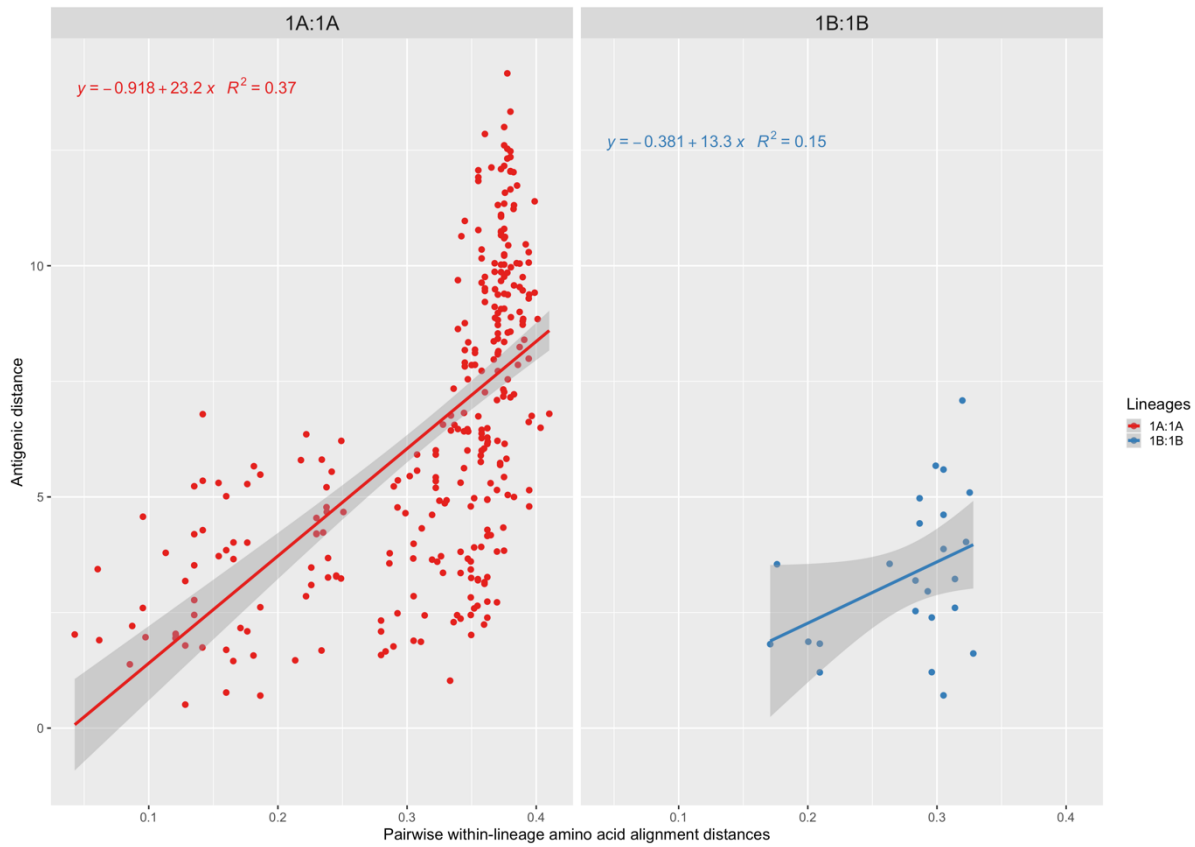

**Figure S3 (A-D).** Web-logo of the amino acid alignment (101-200) of each sub-lineage of North American swine influenza A virus: A (1A.1.x), B (1A.3.x), C (1B.2.1) and D (1B.2.2.1). Logo shows variation at each amino acid residue in a region of the protein in which largely determines antigenicity (recognised by host antibodies). (Crooks et al. 2004)

A

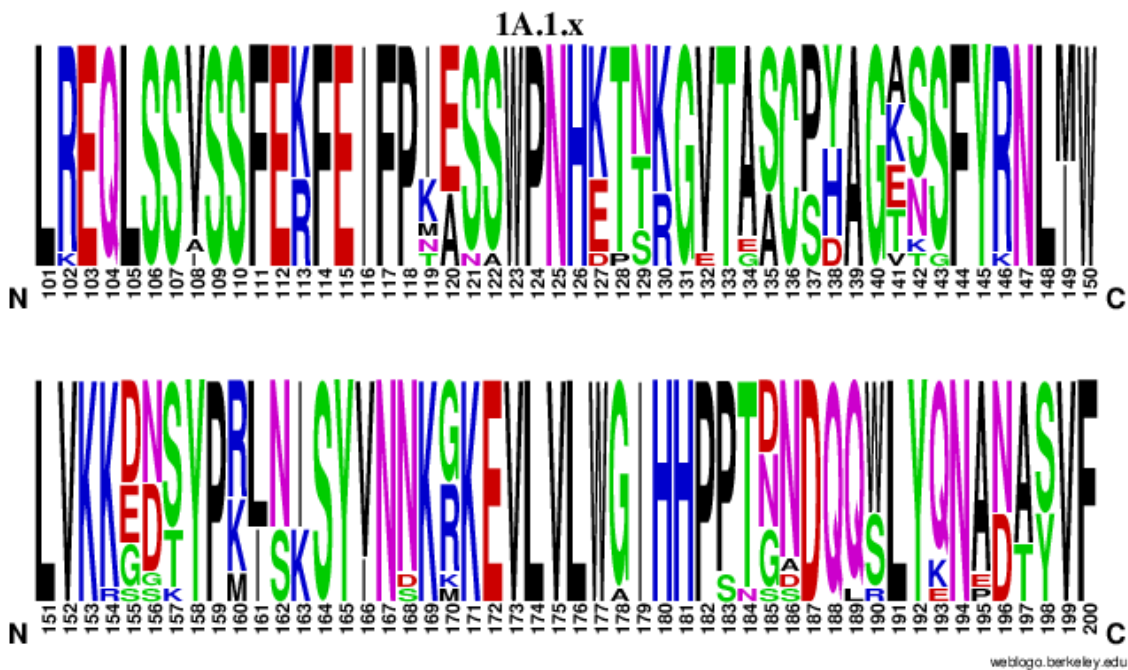

B

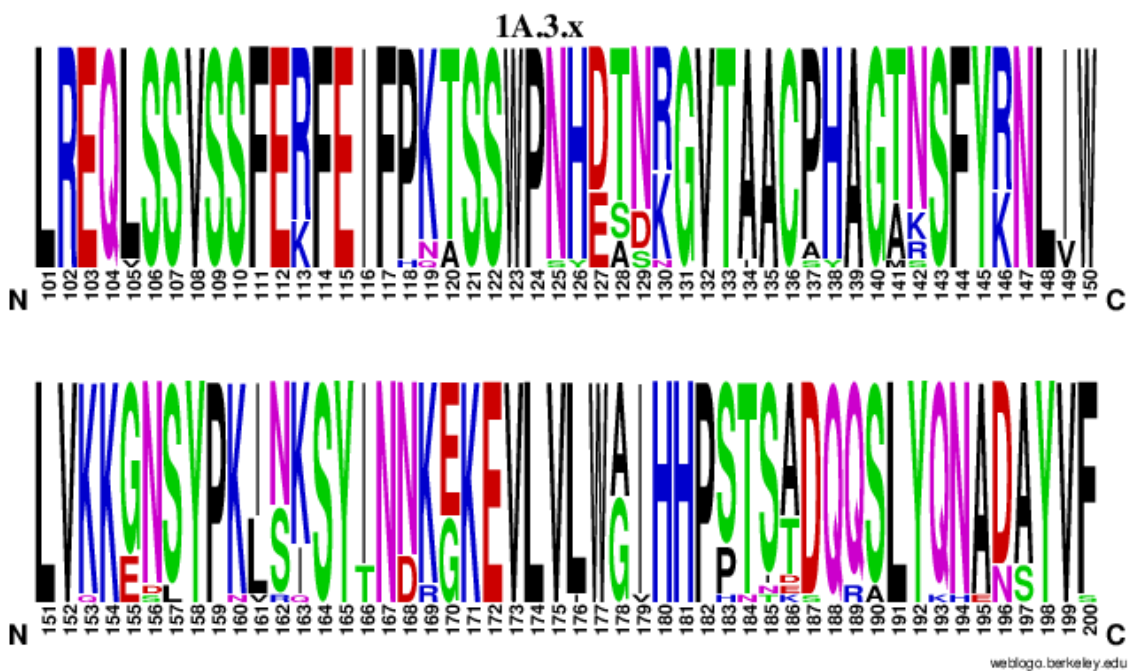

C

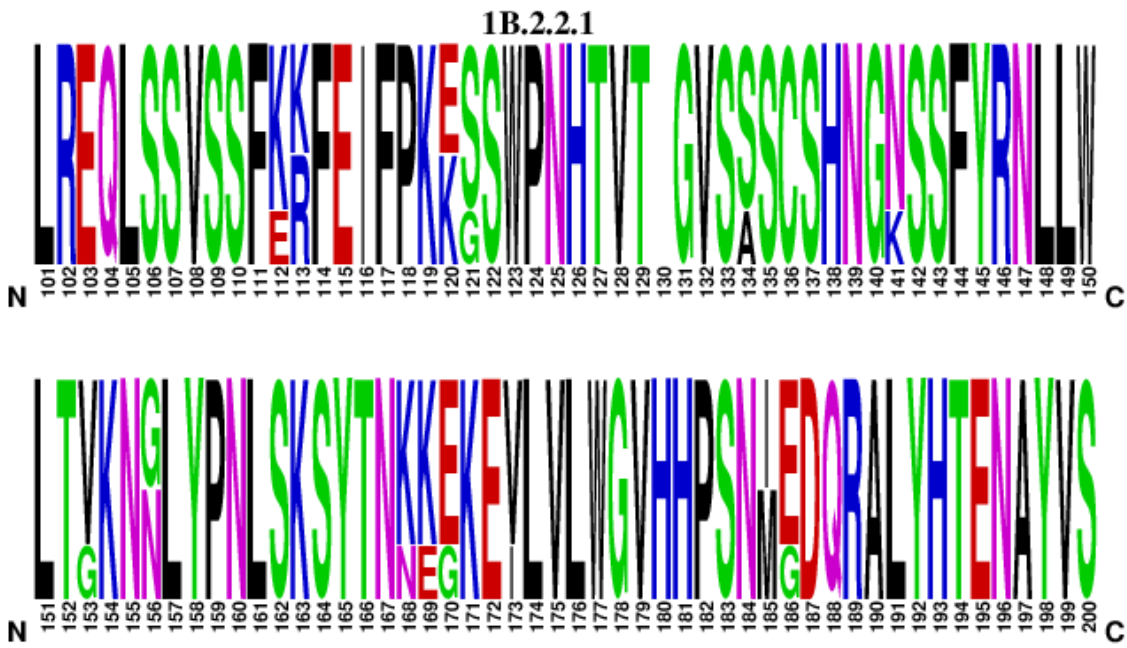

[weblogo.berkeley.edu](http://weblogo.berkeley.edu)

D

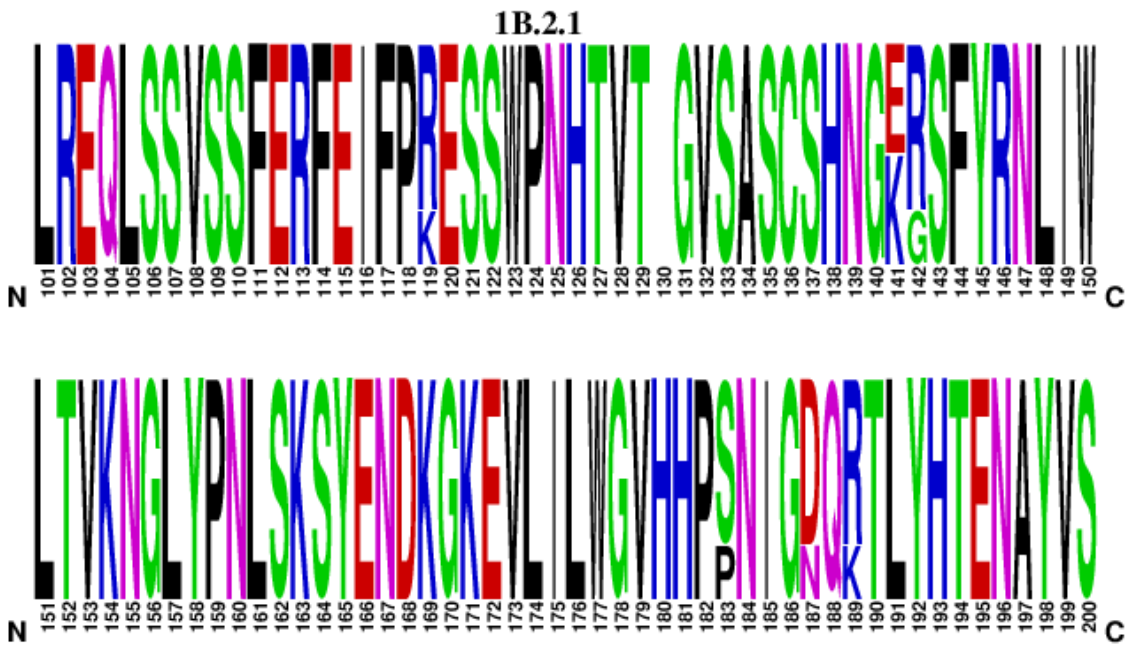

[weblogo.berkeley.edu](http://weblogo.berkeley.edu)

**Figure S4 (A-B).** Combined post-exposure and post-vaccination titres of human sera against representative swine strains, stratified by (A) low – to – high responders to MI15 (A/Michigan/45/2015) vaccine strain, (B) low – to – high responders to MI15 and period of birth (1945-76, 1977-88, 1989-96). Violin box plots show the median of aggregated HI titres against H1N1 strains with 5th and 95th percentile and standard deviation. Each dot represents the GMT: geometric mean titre,  $\log_2$  (HI titre /10) of human sera on the y-axis against each strain (shown on x-axis). Cohorts are combined as results are similar for individual cohorts).

**A** HI Titers by low to high MI15 responders

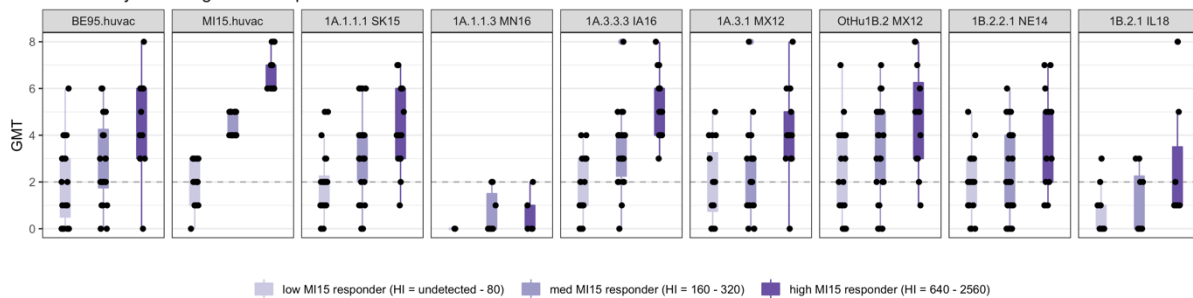

**B** HI Titers by low to high MI15 responders

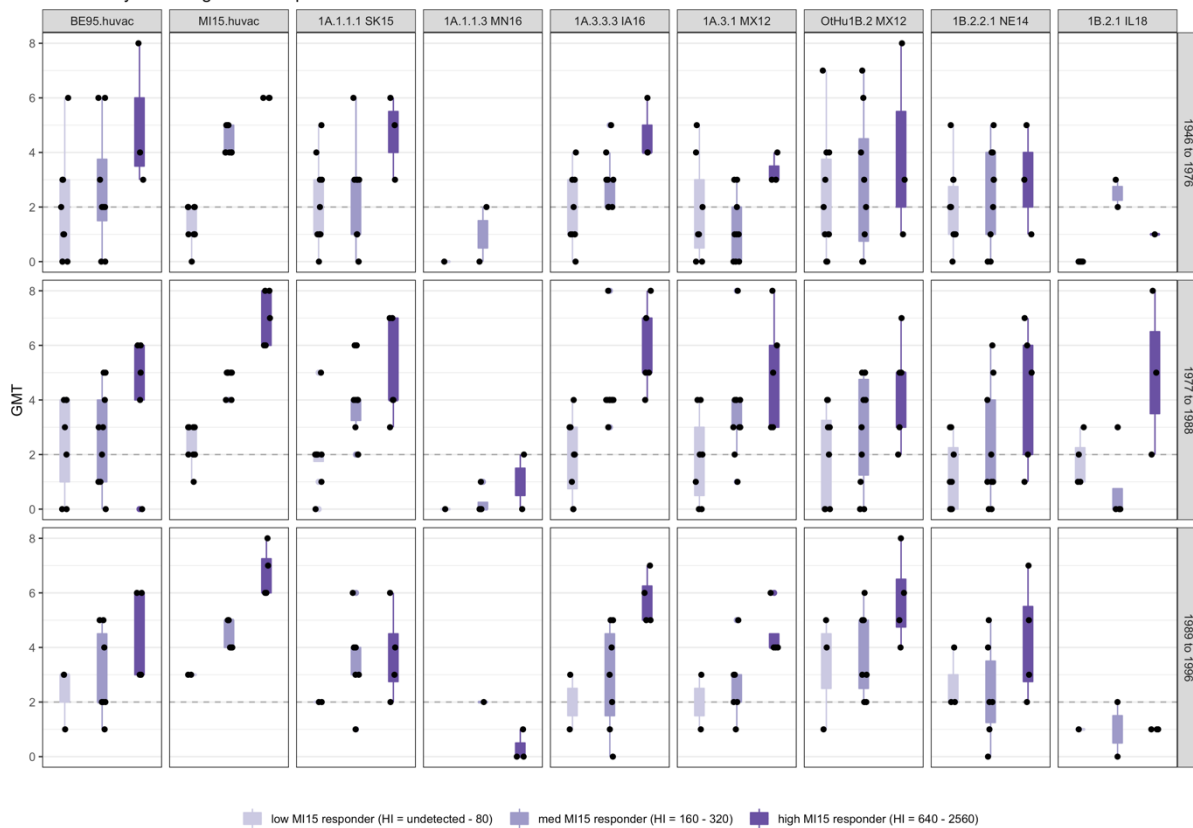

**Figure S5.** Spearman's correlation between HI titers against North American H1 swine strains and human seasonal H1 vaccine strains of post-exposure convalescent and post-vaccination human sera cohorts (combined as results similar to individual cohorts).

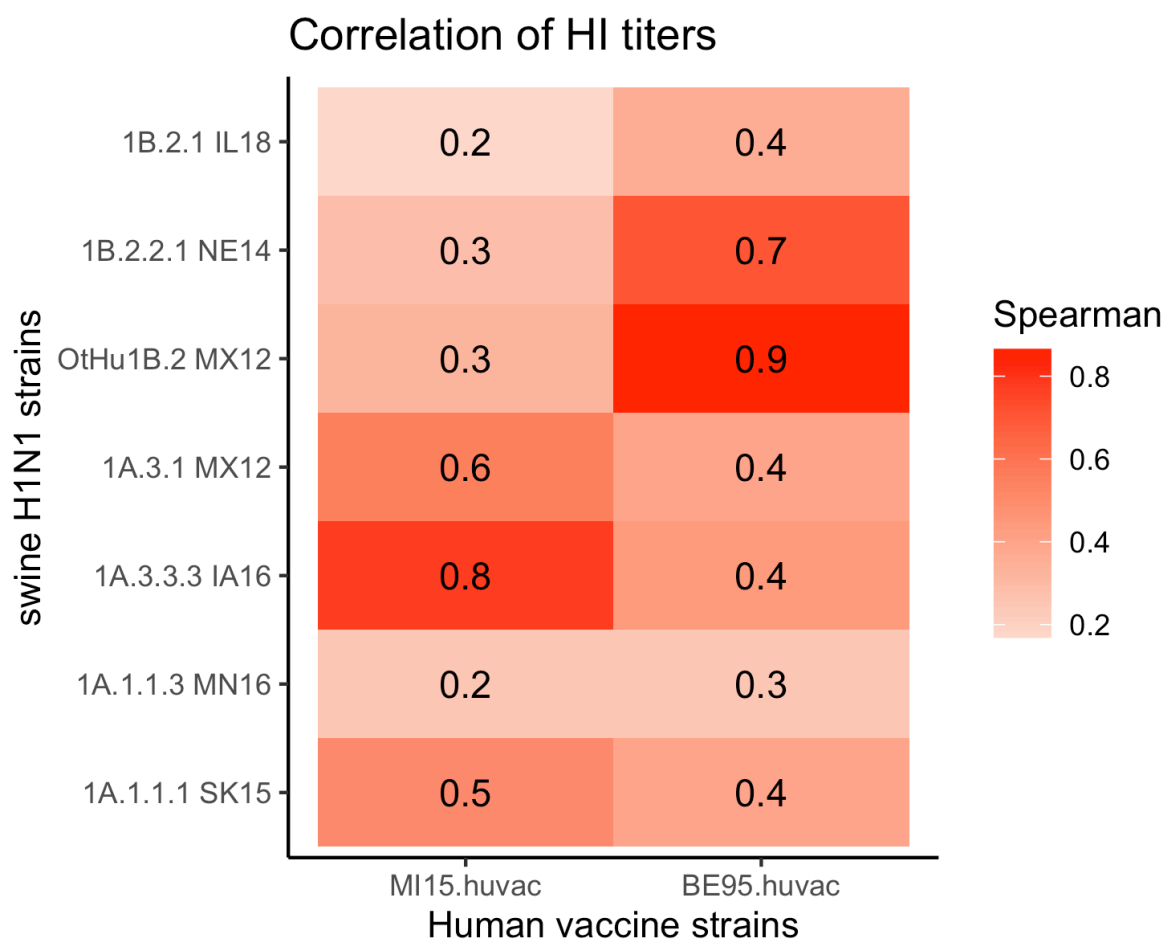



**Table S1.** A list of swine and human influenza A viruses and sera raised against them that have been used in this study.

| Viruses tested against swine sera     | virus clade      | virus subtype | HA reference | Swine sera raised against virus     | virus clade      | virus subtype | HA reference |
|---------------------------------------|------------------|---------------|--------------|-------------------------------------|------------------|---------------|--------------|
| A/swine/Alberta/SD0125/2015           | 1A.1.1           | H1N1          | MF768555     | A/swine/Iowa/1973                   | 1A.1.1           | H1N1          | EU139826     |
| A/swine/Saskatchewan/SD0094/2015*     | 1A.1.1           | H1N1          | MF768483     | A/swine/Alberta/SD0125/2015         | 1A.1.1           | H1N1          | MF768555     |
| A/swine/Alberta/SD0014/2013           | 1A.1.1           | H1N1          | CY195078     | A/swine/Alberta/SD0014/2013         | 1A.1.1           | H1N1          | CY195078     |
| A/swine/Alberta/SD0154/2016           | 1A.1.1           | H1N1          | MF768523     | A/swine/Alberta/SD0154/2016         | 1A.1.1           | H1N1          | MF768523     |
| A/swine/Manitoba/D0333/2014           | 1A.1.1           | H1N2          | CY195575     | A/swine/Manitoba/D0333/2014         | 1A.1.1           | H1N2          | CY195575     |
| A/swine/Manitoba/D0392/2015           | 1A.1.1           | H1N2          | MF768531     | A/swine/Minnesota/02053/2008        | 1A.1.1           | H1N1          | HM461762     |
| A/swine/Saskatchewan/SD0102/2015      | 1A.1.1           | H1N2          | MF768539     | A/swine/Manitoba/D0392/2015         | 1A.1.1           | H1N2          | MF768531     |
| A/swine/Manitoba/SD0114/2015          | 1A.1.1           | H1N2          | MF768507     | A/swine/Saskatchewan/SD0102/2015    | 1A.1.1           | H1N2          | MF768539     |
| A/swine/Alberta/SD0191/2016           | 1A.1.1           | H1N2          | MF768475     | A/swine/Manitoba/SD0114/2015        | 1A.1.1           | H1N2          | MF768507     |
| A/swine/Saskatchewan/SD0200/2016      | 1A.1.1           | H1N2          | MF768547     | A/swine/Saskatchewan/SD0142/2016    | 1A.1.1           | H1N2          | MK462362     |
| A/swine/Manitoba/D0348/2014           | 1A.1.1           | H1N2          | CY195295     | A/swine/Minnesota/A01781045/2016    | 1A.1.1           | H1N2          | KX928680     |
| A/Minnesota/45/2016                   | 1A.1.1           | H1N2          | EPI760602    | A/swine/Minnesota/37866/1999        | 1A.2-3-like      | H1N1          | EU139827     |
| A/swine/Minnesota/A01781045/2016*     | 1A.1.1           | H1N2          | KX928680     | A/swine/South Dakota/A01349306/2013 | 1A.3.2           | H1N1          | KC844200     |
| A/swine/Mexico/AVX23/2012*            | 1A.2-3-like      | H1N1          | KU976649     | A/swine/Minnesota/1192/2001         | 1A.3.3-like      | H1N2          | EU139828     |
| A/swine/Illinois/A01493472/2014       | 1A.3.3.2         | H1N1          | KJ701784     | A/Mexico/4108/2009                  | 1A.3.3.2         | H1N1          | GQ223112     |
| A/California/04/2009                  | 1A.3.3.2         | H1N1          | GQ280797     | A/swine/Illinois/A01493472/2014     | 1A.3.3.2         | H1N1          | KJ701784     |
| A/Mexico/4108/2009                    | 1A.3.3.2         | H1N1          | GQ223112     | A/California/04/2009                | 1A.3.3.2         | H1N1          | GQ280797     |
| A/Michigan/45/2015*                   | 1A.3.3.2         | H1N1          | KU933493     | A/Michigan/45/2015                  | 1A.3.3.2         | H1N1          | KU933493     |
| A/swine/Mexico/AVX31/2012             | 1A.3.3.2         | H1N1          | KU976950     | A/swine/Minnesota/00194/2003        | 1A.3.3.3         | H1N2          | EU139830     |
| A/swine/Mexico/AVX44/2012             | 1A.3.3.2         | H1N1          | KU976796     | A/swine/Kansas/00246/2004           | 1A.3.3.3         | H1N2          | CY081680     |
| A/swine/North Carolina/A02076926/2015 | 1A.3.3.3         | H1N1          | KT429540     | A/swine/OH/511445/2007              | 1A.3.3.3         | H1N1          | EU604689     |
| A/swine/North Carolina/A01841602/2015 | 1A.3.3.3         | H1N1          | KR088267     | A/swine/Missouri/02060/2008         | 1A.3.3.3         | H1N1          | CY082655     |
| A/swine/Ohio/A01847657/2015           | 1A.3.3.3         | H1N1          | KR780630     | A/swine/North Carolina/02023/2008   | 1A.3.3.3         | H1N1          | HM461818     |
| A/Ohio/09/2015                        | 1A.3.3.3         | H1N1          | EPI587643    | A/swine/Ohio/02026/2008             | 1A.3.3.3         | H1N1          | CY082631     |
| A/swine/Minnesota/A01567490/2014      | 1A.3.3.3         | H1N1          | KP662638     | A/Ohio/09/2015                      | 1A.3.3.3         | H1N1          | EPI587643    |
| A/swine/North Carolina/A01797415/2015 | 1A.3.3.3         | H1N1          | KU357008     | A/swine/Iowa/A01731653/2016         | 1A.3.3.3         | H1N1          | KU877398     |
| A/swine/Iowa/A01731653/2016*          | 1A.3.3.3         | H1N1          | KU877398     | A/swine/Illinois/00685/2005         | 1B.2.1           | H1            | CY081899     |
| A/swine/North Carolina/A01730369/2016 | 1A.3.3.3         | H1N1          | KU695684     | A/swine/Oklahoma/A01409770/2014     | 1B.2.1           | H1N2          | KJ437589     |
| A/swine/Oklahoma/A01409770/2014       | 1B.2.1           | H1N2          | KJ437589     | A/swine/Minnesota/A01134353/2011    | 1B.2.2.1         | H1N2          | JQ906881     |
| A/swine/Illinois/A02139356/2018*      | 1B.2.1           | H1N2          | MG917068     | A/swine/Nebraska/A01492366/2014     | 1B.2.2.1         | H1N2          | KJ549771     |
| A/swine/Michigan/A01104117/2018       | 1B.2.1           | H1N2          | MH758776     | A/Brazil/11/1978                    | Other-Human      | H1N1          | CY020293     |
| A/swine/Minnesota/A01134353/2011      | 1B.2.2.1         | H1N2          | JQ906881     | A/Taiwan/1/1986                     | Other-Human-1B.2 | H1N1          | X17224       |
| A/swine/Nebraska/A01492366/2014*      | 1B.2.2.1         | H1N2          | KJ549771     | A/Beijing/262/1995                  | Other-Human-1B.2 | H1N1          | AJ457900     |
| A/swine/Illinois/A01644323/2018       | 1B.2.2.1         | H1N2          | MG825101     | A/New Caledonia/20/1999             | Other-Human-1B.2 | H1N1          | EU103824     |
| A/Brazil/11/1978                      | Other-Human      | H1N1          | CY020293     | A/Solomon Islands/3/2006            | Other-Human-1B.2 | H1N1          | EU124135     |
| A/New Caledonia/20/1999               | Other-Human-1B.2 | H1N1          | EU103824     |                                     |                  |               |              |
| A/swine/Mexico/AVX18/2012*            | Other-Human-1B.2 | H1N2          | KU976609     |                                     |                  |               |              |
| A/swine/Mexico/AVX61/2013             | Other-Human-1B.2 | H1N2          | KU976596     |                                     |                  |               |              |
| A/Solomon Islands/3/2006              | Other-Human-1B.2 | H1N1          | EU124135     |                                     |                  |               |              |
| A/Singapore/6/1986                    | Other-Human-1B.2 | H1N1          | CY020477     |                                     |                  |               |              |
| A/Taiwan/1/1986                       | Other-Human-1B.2 | H1N1          | X17224       |                                     |                  |               |              |
| A/Texas/36/1991                       | Other-Human-1B.2 | H1N1          | AJ457908     |                                     |                  |               |              |
| A/Beijing/262/1995*                   | Other-Human-1B.2 | H1N1          | AJ457900     |                                     |                  |               |              |
| A/Michigan/2/2003                     | Other-Human-1B.2 | H1N2          | CY016324     |                                     |                  |               |              |
| A/Brisbane/59/2007                    | Other-Human-1B.2 | H1N1          | KF009550     |                                     |                  |               |              |

\*viruses tested against human sera





**Table S3.** Risk ranking scoring system used to prioritize representative swine H3N2 strains for the assessment of human immunity for pandemic potential.

| strain                                | global lineage   | blast_USA 2yr | blast_global 10yr | revblast_USA 2yr | revblast_global 10yr | Sequence Factor | ABRAZIL/11/1978 | ASINGAPORE/1986 | ATAWAN/1/1986 | ATEXAS/36/1991 | ABELJUNG/262/1995 | ANEW_CALEDONIA/20/1999 | AMICHIGAN/2/2003 | ASOLOMON_ISLANDS/3/200 | ABRISBANE/59/2007 | ACALIFORNIA/4/2009 | AMICHIGAN/45/2015 | all_vaccine | stdev | >3 | Antigenic Factor | Summed Factor |
|---------------------------------------|------------------|---------------|-------------------|------------------|----------------------|-----------------|-----------------|-----------------|---------------|----------------|-------------------|------------------------|------------------|------------------------|-------------------|--------------------|-------------------|-------------|-------|----|------------------|---------------|
| A/SWINE/SASKATCHEWAN/SD0094/2015      | 1A.1.1-1         | 0.00          | 0.18              | 0.00             | 23.67                | 40.40           | 5.77            | 3.65            | 5.82          | 5.62           | 6.40              | 5.69                   | 5.09             | 6.15                   | 7.81              | 3.54               | 2.56              | 5.28        | 1.49  | 10 | 14.48            | 54.89         |
| A/SWINE/ALBERTA/SD0154/2016           | 1A.1.1-1         | 0.00          | 0.06              | 0.00             | 0.06                 | 0.20            | 6.96            | 4.91            | 6.62          | 6.41           | 7.56              | 6.25                   | 6.27             | 6.69                   | 7.79              | 2.12               | 1.85              | 5.77        | 2.01  | 9  | 15.04            | 15.25         |
| A/SWINE/ALBERTA/SD0125/2015           | 1A.1.1-1         | 0.00          | 0.06              | 0.00             | 9.45                 | 16.11           | 6.03            | 5.29            | 6.05          | 6.09           | 7.99              | 7.37                   | 6.77             | 7.34                   | 8.65              | 3.12               | 1.75              | 6.04        | 2.05  | 10 | 16.16            | 32.27         |
| A/SWINE/ALBERTA/SD0014/2013           | 1A.1.1-1         | 0.00          | 0.06              | 0.00             | 0.06                 | 0.20            | 6.91            | 5.54            | 8.09          | 8.08           | 8.23              | 7.83                   | 6.93             | 8.79                   | 10.56             | 4.35               | 2.47              | 7.07        | 2.24  | 10 | 16.71            | 16.92         |
| A/SWINE/MANITOBA/D0333/2014           | 1A.1.1-3         | 0.00          | 0.06              | 0.00             | 0.18                 | 0.41            | 9.33            | 5.22            | 9.49          | 8.96           | 6.89              | 5.00                   | 5.72             | 7.43                   | 8.87              | 5.87               | 5.92              | 7.15        | 1.74  | 11 | 16.21            | 16.62         |
| A/SWINE/SASKATCHEWAN/SD0200/2016      | 1A.1.1-3-del     | 0.00          | 0.12              | 0.00             | 0.18                 | 0.51            | 6.17            | 3.33            | 7.13          | 6.75           | 2.97              | 5.34                   | 2.77             | 6.42                   | 9.32              | 9.62               | 8.65              | 6.22        | 2.44  | 9  | 16.33            | 16.84         |
| A/SWINE/MANITOBA/D0348/2014           | 1A.1.1-3-del     | 0.00          | 0.24              | 0.22             | 1.65                 | 3.50            | 5.82            | 3.38            | 6.90          | 6.56           | 2.96              | 5.64                   | 2.86             | 6.49                   | 9.45              | 9.80               | 8.75              | 6.24        | 2.47  | 9  | 16.40            | 19.90         |
| A/SWINE/MANITOBA/SD0114/2015          | 1A.1.1-3-del     | 0.00          | 0.41              | 3.51             | 1.06                 | 7.29            | 5.70            | 4.29            | 7.65          | 7.52           | 4.83              | 7.11                   | 4.42             | 8.05                   | 10.97             | 9.75               | 8.34              | 7.15        | 2.17  | 11 | 17.51            | 24.80         |
| A/SWINE/ALBERTA/SD0191/2016           | 1A.1.1-3-del     | 0.00          | 0.12              | 0.15             | 0.41                 | 1.10            | 6.35            | 3.90            | 7.61          | 7.28           | 3.62              | 6.01                   | 3.46             | 7.11                   | 10.02             | 10.00              | 8.92              | 6.75        | 2.38  | 11 | 18.13            | 19.24         |
| A/SWINE/SASKATCHEWAN/SD0102/2015      | 1A.1.1-3-del     | 0.00          | 0.12              | 0.15             | 0.83                 | 1.81            | 7.38            | 5.82            | 8.91          | 8.66           | 4.88              | 7.73                   | 5.18             | 8.64                   | 11.61             | 12.07              | 10.89             | 8.34        | 2.47  | 11 | 18.42            | 20.24         |
| A/SWINE/MINNESOTA/A01781045/2016      | 1A.1.1-3-del     | 0.00          | 0.18              | 2.71             | 1.36                 | 6.31            | 3.25            | 4.13            | 5.14          | 5.21           | 4.10              | 7.39                   | 4.19             | 7.01                   | 10.02             | 10.30              | 8.90              | 6.33        | 2.53  | 11 | 18.59            | 24.91         |
| A/MINNESOTA/45/2016                   | 1A.1.1-3-del     | 1.10          | 0.00              | 5.34             | 0.47                 | 9.60            | 4.77            | 5.29            | 6.18          | 6.15           | 4.25              | 7.95                   | 4.84             | 7.53                   | 10.56             | 11.86              | 10.59             | 7.27        | 2.67  | 11 | 19.00            | 28.60         |
| A/SWINE/MANITOBA/D0392/2015           | 1A.1.1-3-del     | 0.00          | 0.12              | 0.00             | 0.24                 | 0.61            | 8.06            | 7.03            | 8.07          | 7.69           | 4.53              | 7.95                   | 5.81             | 7.50                   | 10.20             | 13.91              | 13.14             | 8.54        | 2.85  | 11 | 19.54            | 20.15         |
| A/SWINE/MEXICO/AVX23/2012             | 1A.3.1           | 0.00          | 0.24              | 2.71             | 7.14                 | 16.21           | 7.35            | 6.23            | 6.25          | 6.15           | 8.64              | 7.34                   | 7.51             | 6.93                   | 7.42              | 2.79               | 3.20              | 6.35        | 1.81  | 10 | 15.43            | 31.64         |
| A/SWINE/MEXICO/AVX31/2012             | 1A.3.3.2         | 0.00          | 0.06              | 0.00             | 3.25                 | 5.61            | 7.75            | 5.66            | 7.05          | 6.80           | 8.20              | 6.51                   | 6.93             | 6.87                   | 7.55              | 1.45               | 2.27              | 6.10        | 2.20  | 9  | 15.61            | 21.21         |
| A/SWINE/MEXICO/AVX44/2012             | 1A.3.3.2         | 0.00          | 0.12              | 0.00             | 0.18                 | 0.51            | 7.73            | 4.59            | 7.95          | 7.62           | 7.08              | 5.62                   | 5.72             | 7.12                   | 8.57              | 3.58               | 3.21              | 6.25        | 1.83  | 11 | 16.50            | 17.00         |
| A/SWINE/ILLINOIS/A01493472/2014       | 1A.3.3.2         | 0.00          | 0.35              | 6.88             | 30.70                | 62.00           | 9.14            | 7.22            | 8.42          | 8.21           | 9.73              | 7.77                   | 8.46             | 8.19                   | 8.44              | 0.71               | 2.72              | 7.18        | 2.82  | 9  | 17.45            | 79.45         |
| A/SWINE/NORTH_CAROLINA/A01797415/2015 | 1A.3.3.3         | 0.00          | 0.00              | 0.22             | 0.30                 | 0.81            | 7.33            | 5.00            | 5.59          | 5.14           | 7.02              | 5.24                   | 5.97             | 4.83                   | 5.23              | 3.74               | 4.53              | 5.42        | 1.04  | 11 | 14.12            | 14.93         |
| A/SWINE/IOWA/A01731653/2016           | 1A.3.3.3         | 1.68          | 0.00              | 36.21            | 0.12                 | 52.00           | 6.82            | 5.54            | 5.05          | 4.81           | 7.63              | 6.43                   | 6.64             | 5.53                   | 6.00              | 4.09               | 4.49              | 5.73        | 1.09  | 11 | 14.26            | 66.26         |
| A/SWINE/NORTH_CAROLINA/A01730369/2016 | 1A.3.3.3         | 0.00          | 0.00              | 0.00             | 0.00                 | 0.00            | 6.19            | 2.77            | 6.53          | 6.18           | 5.33              | 4.69                   | 3.98             | 5.95                   | 7.96              | 4.86               | 4.08              | 5.32        | 1.44  | 10 | 14.32            | 14.32         |
| A/SWINE/MINNESOTA/A01567490/2014      | 1A.3.3.3         | 0.07          | 0.00              | 2.56             | 1.53                 | 6.19            | 8.40            | 6.39            | 6.98          | 6.66           | 8.63              | 6.65                   | 7.49             | 6.53                   | 6.55              | 2.51               | 3.88              | 6.42        | 1.79  | 10 | 15.38            | 21.56         |
| A/OHIO/09/2015                        | 1A.3.3.3         | 0.00          | 0.00              | 0.00             | 0.06                 | 0.10            | 9.26            | 5.38            | 8.00          | 7.35           | 7.09              | 3.99                   | 5.97             | 5.40                   | 5.59              | 4.14               | 5.43              | 6.14        | 1.62  | 11 | 15.85            | 15.95         |
| A/SWINE/NORTH_CAROLINA/A02076926/2015 | 1A.3.3.3         | 0.07          | 0.00              | 1.46             | 0.06                 | 2.19            | 10.44           | 7.07            | 8.92          | 8.34           | 8.86              | 5.74                   | 7.76             | 6.64                   | 6.02              | 3.75               | 5.68              | 7.20        | 1.89  | 11 | 16.68            | 18.88         |
| A/SWINE/NORTH_CAROLINA/A01841602/2015 | 1A.3.3.3         | 0.00          | 0.00              | 0.80             | 0.00                 | 1.09            | 10.84           | 7.00            | 8.98          | 8.23           | 8.18              | 4.67                   | 7.30             | 5.68                   | 4.62              | 5.62               | 7.29              | 7.13        | 1.91  | 11 | 16.72            | 17.81         |
| A/SWINE/OHIO/A01847657/2015           | 1A.3.3.3         | 0.00          | 0.00              | 0.00             | 0.06                 | 0.10            | 10.82           | 6.62            | 9.30          | 8.53           | 7.74              | 4.09                   | 6.83             | 5.80                   | 5.31              | 5.80               | 7.28              | 7.10        | 1.93  | 11 | 16.78            | 16.88         |
| A/SWINE/MICHIGAN/A01104117/2018       | 1B.2.1           | 1.83          | 0.00              | 5.41             | 0.00                 | 9.90            | 4.32            | 2.01            | 4.75          | 4.38           | 1.94              | 4.91                   | 1.71             | 4.91                   | 7.91              | 8.84               | 7.90              | 4.87        | 2.48  | 8  | 15.44            | 25.34         |
| A/SWINE/OKLAHOMA/A01409770/2014       | 1B.2.1           | 0.15          | 0.00              | 2.56             | 2.01                 | 7.11            | 3.60            | 2.89            | 4.84          | 4.70           | 3.00              | 6.10                   | 2.90             | 5.94                   | 8.96              | 9.37               | 8.16              | 5.50        | 2.43  | 9  | 16.29            | 23.40         |
| A/SWINE/ILLINOIS/A02139356/2018       | 1B.2.1           | 0.37          | 0.00              | 8.34             | 0.00                 | 11.91           | 4.84            | 4.51            | 6.47          | 6.37           | 3.85              | 7.29                   | 4.15             | 7.36                   | 10.43             | 11.02              | 9.72              | 6.91        | 2.55  | 11 | 18.65            | 30.55         |
| A/SWINE/ILLINOIS/A01644323/2018       | 1B.2.2.1         | 0.07          | 0.00              | 6.36             | 1.06                 | 10.59           | 5.37            | 1.68            | 5.81          | 5.45           | 4.24              | 4.39                   | 2.92             | 5.40                   | 7.79              | 5.90               | 5.01              | 4.91        | 1.61  | 9  | 13.83            | 24.42         |
| A/SWINE/NEBRASKA/A01492366/2014       | 1B.2.2.1         | 0.07          | 0.00              | 8.71             | 0.65                 | 13.10           | 4.42            | 0.53            | 4.62          | 4.20           | 2.73              | 4.20                   | 1.61             | 4.51                   | 7.29              | 7.24               | 6.38              | 4.34        | 2.15  | 8  | 14.44            | 27.54         |
| A/SWINE/MINNESOTA/A01134353/2011      | 1B.2.2.1         | 0.00          | 0.00              | 5.71             | 0.00                 | 7.81            | 6.64            | 3.28            | 6.85          | 6.49           | 5.82              | 4.81                   | 4.46             | 6.13                   | 7.93              | 4.32               | 3.70              | 5.49        | 1.47  | 11 | 15.41            | 23.22         |
| A/SWINE/MEXICO/AVX18/2012             | Other_Human_1B.2 | 0.00          | 0.12              | 0.00             | 12.63                | 21.60           | 6.87            | 2.65            | 5.71          | 4.88           | 1.96              | 1.89                   | 1.60             | 2.65                   | 5.29              | 8.23               | 8.15              | 4.53        | 2.52  | 6  | 13.56            | 35.16         |
| A/SWINE/MEXICO/AVX61/2013             | Other_Human_1B.2 | 0.00          | 0.06              | 0.00             | 0.59                 | 1.10            | 5.01            | 1.21            | 5.53          | 5.16           | 3.65              | 4.36                   | 2.39             | 5.23                   | 7.80              | 6.55               | 5.62              | 4.77        | 1.84  | 9  | 14.52            | 15.62         |
